# Supplementary material for: Development and validation of a frailty assessment-based competing risk model for predicting cancer-specific survival in elderly patients with gastric cancer: a dual-center cohort study
Source: Research Square preprint supplement (doi:10.21203/rs.3.rs-6618864/v1), 2025-09-09
Supplement: Supplementary file 1 [file 4035d396bb22819969a3b21e.docx]

**Development and validation of a frailty assessment-based competing risk model for predicting cancer-specific survival in elderly patients with gastric cancer: a dual-center cohort study**

Wu et al.

(Supplementary materials)

**
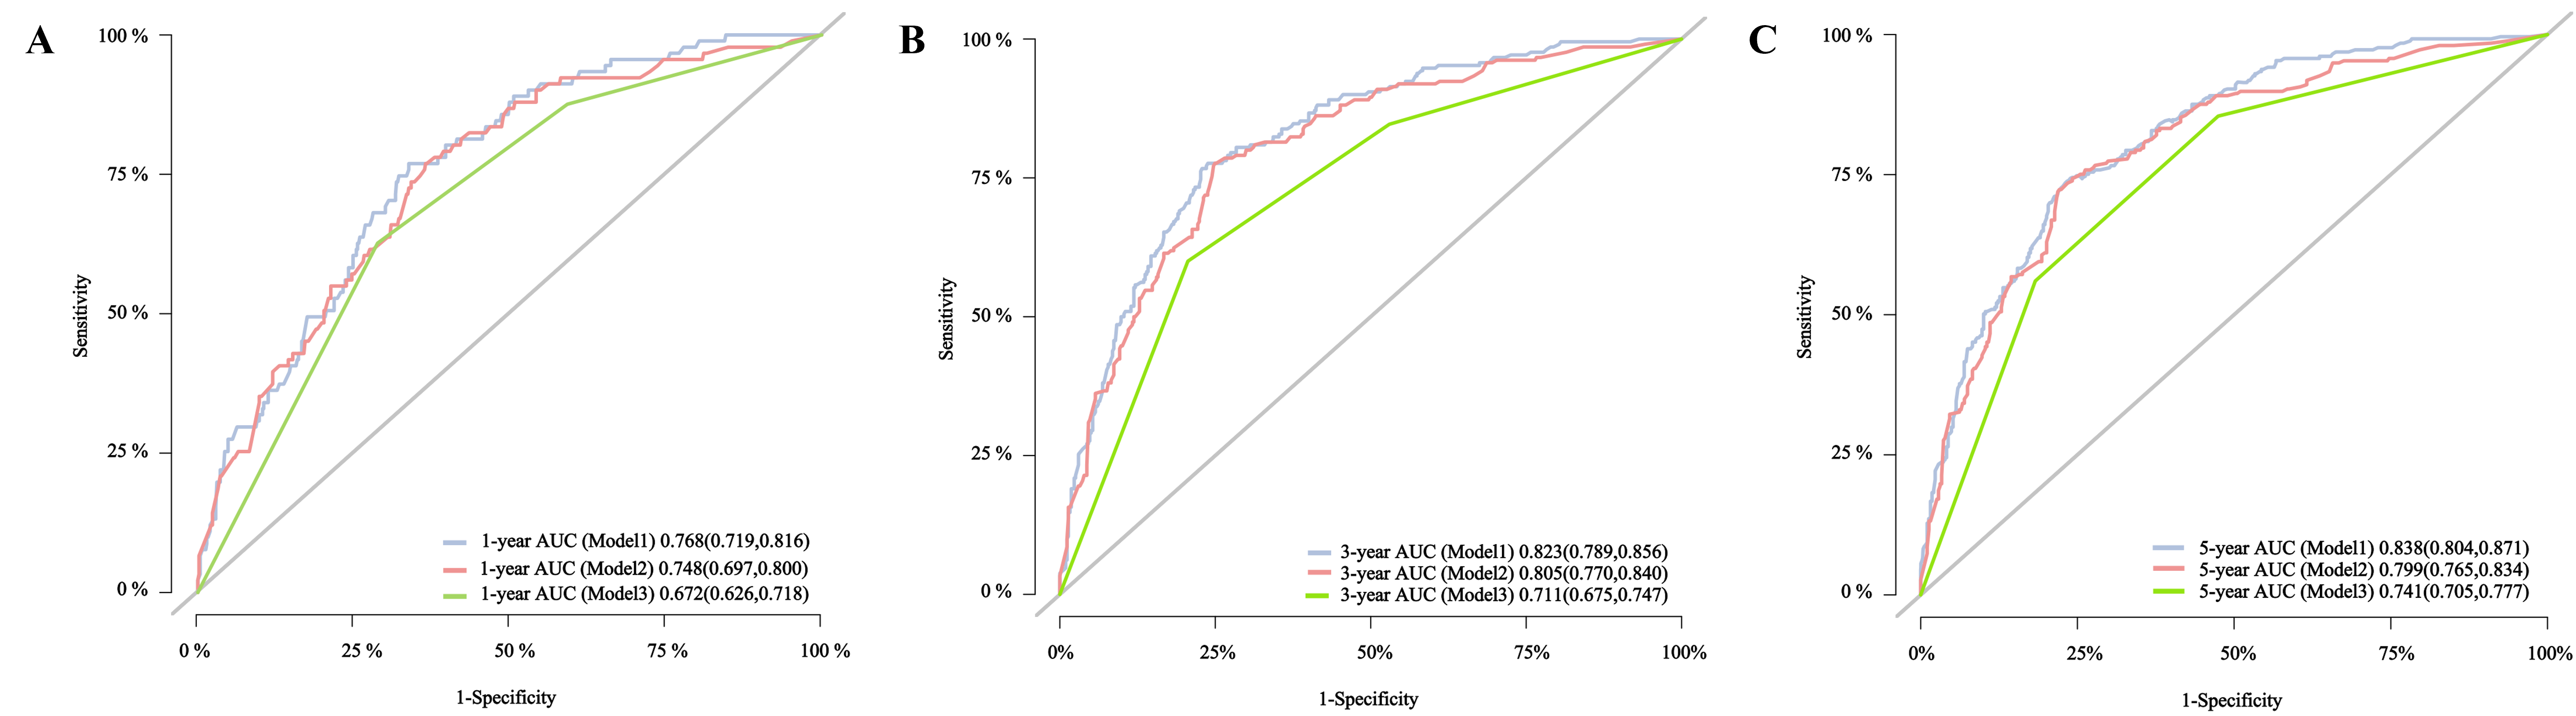
**

**Supplementary Figure. 1** ROC curves for different models in the prediction of the cancer-specific death of elderly gastric cancer patients 1- (A), 3- (B) and 5-year (C) point in training cohort.

**
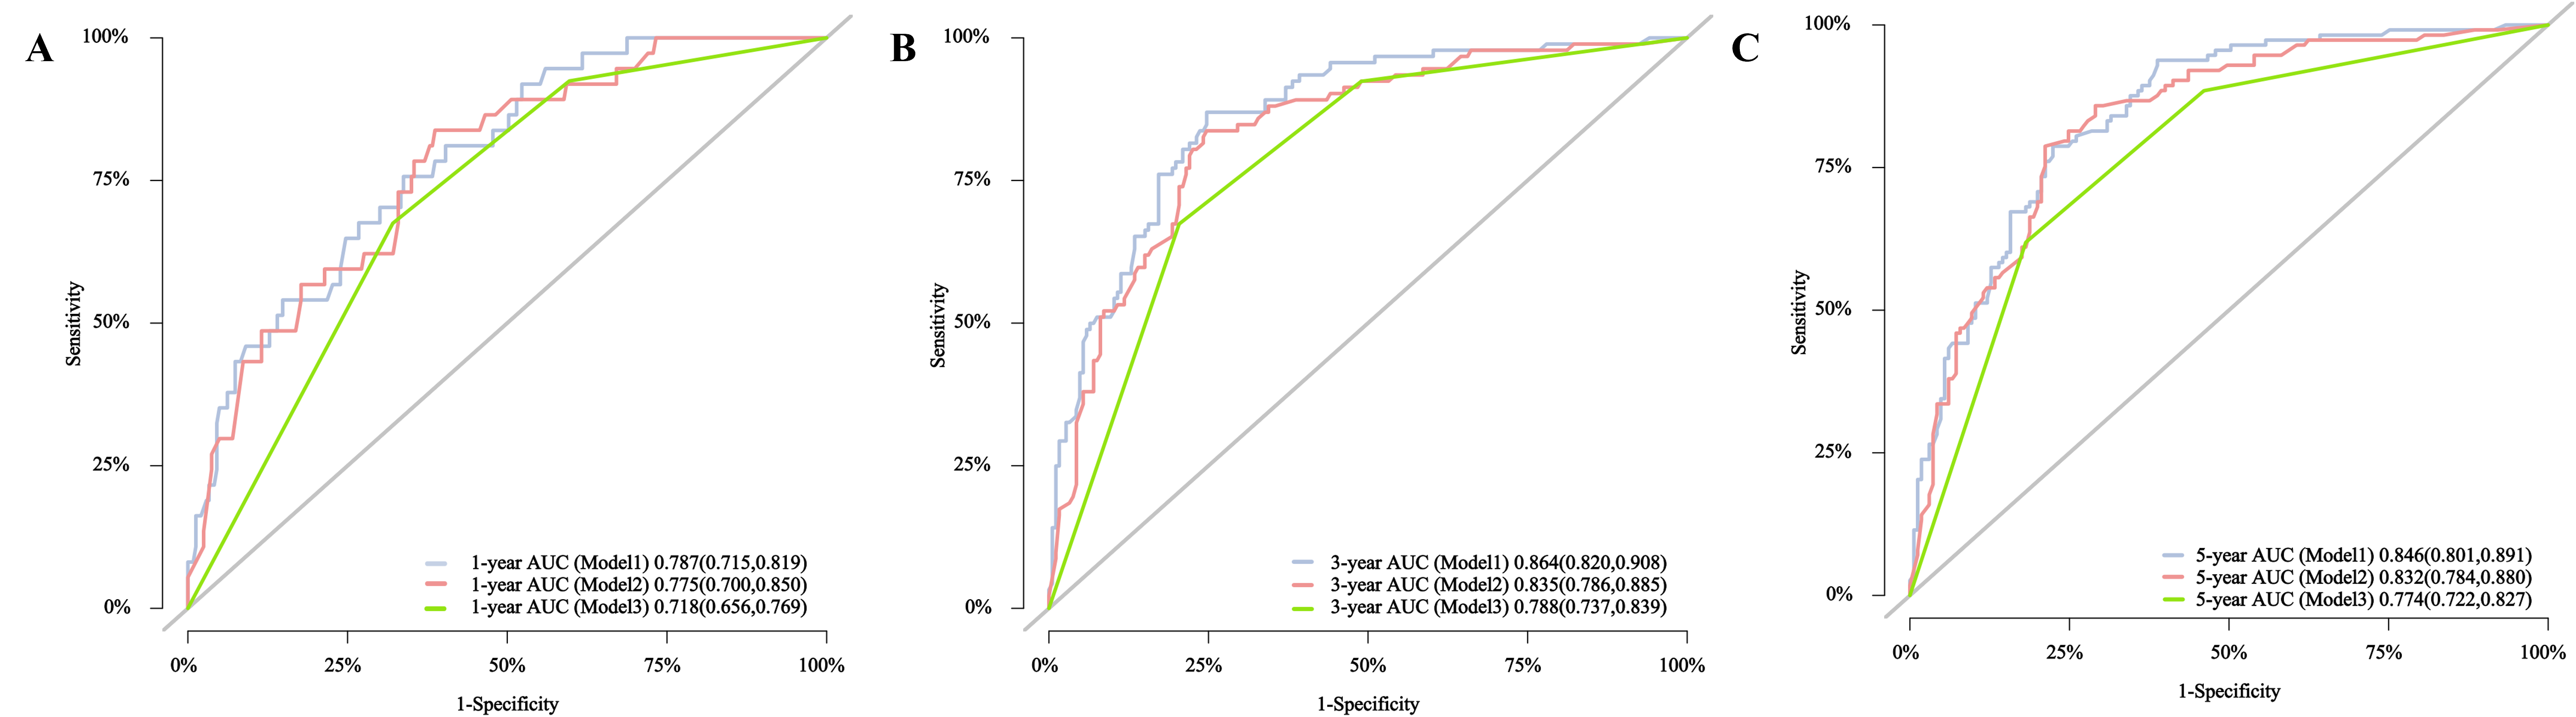
**

**Supplementary Figure. 2** ROC curves for different models in the prediction of the cancer-specific death of elderly gastric cancer patients 1- (A), 3- (B) and 5-year (C) point in internal validation cohort.


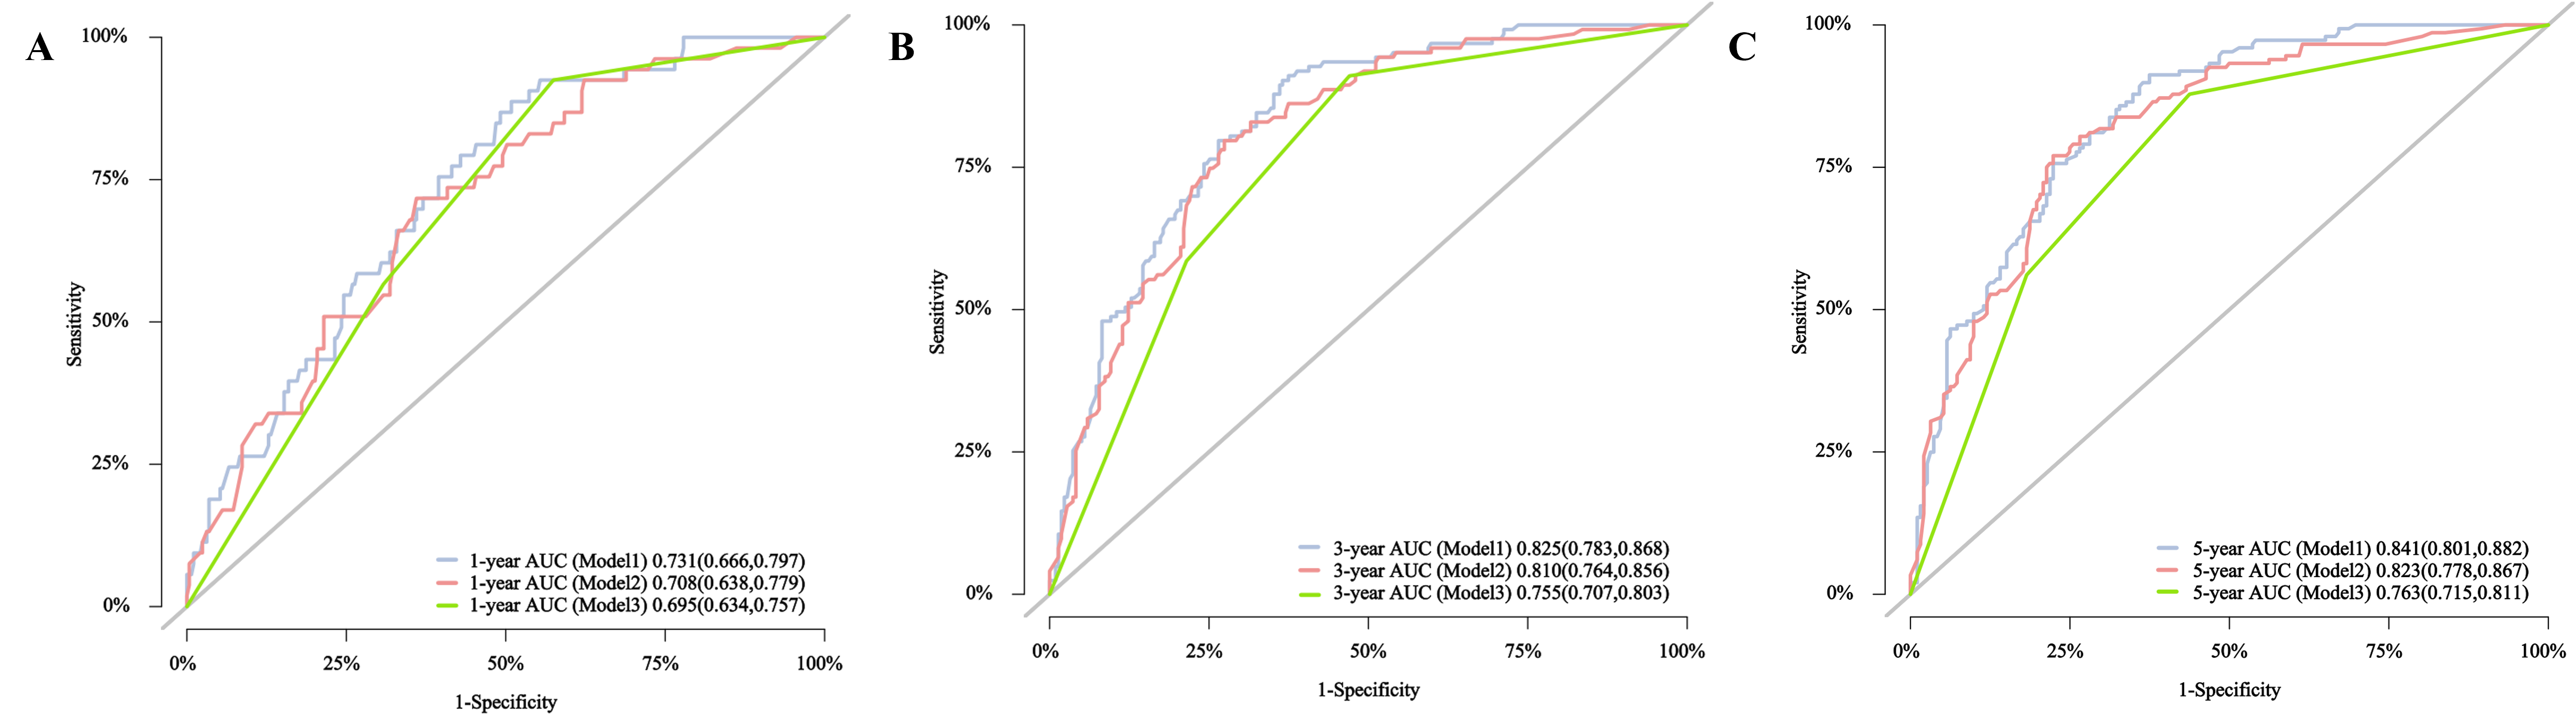


**Supplementary Figure. 3** ROC curves for different models in the prediction of the cancer-specific death of elderly gastric cancer patients 1- (A), 3- (B) and 5-year (C) point in external validation cohort.


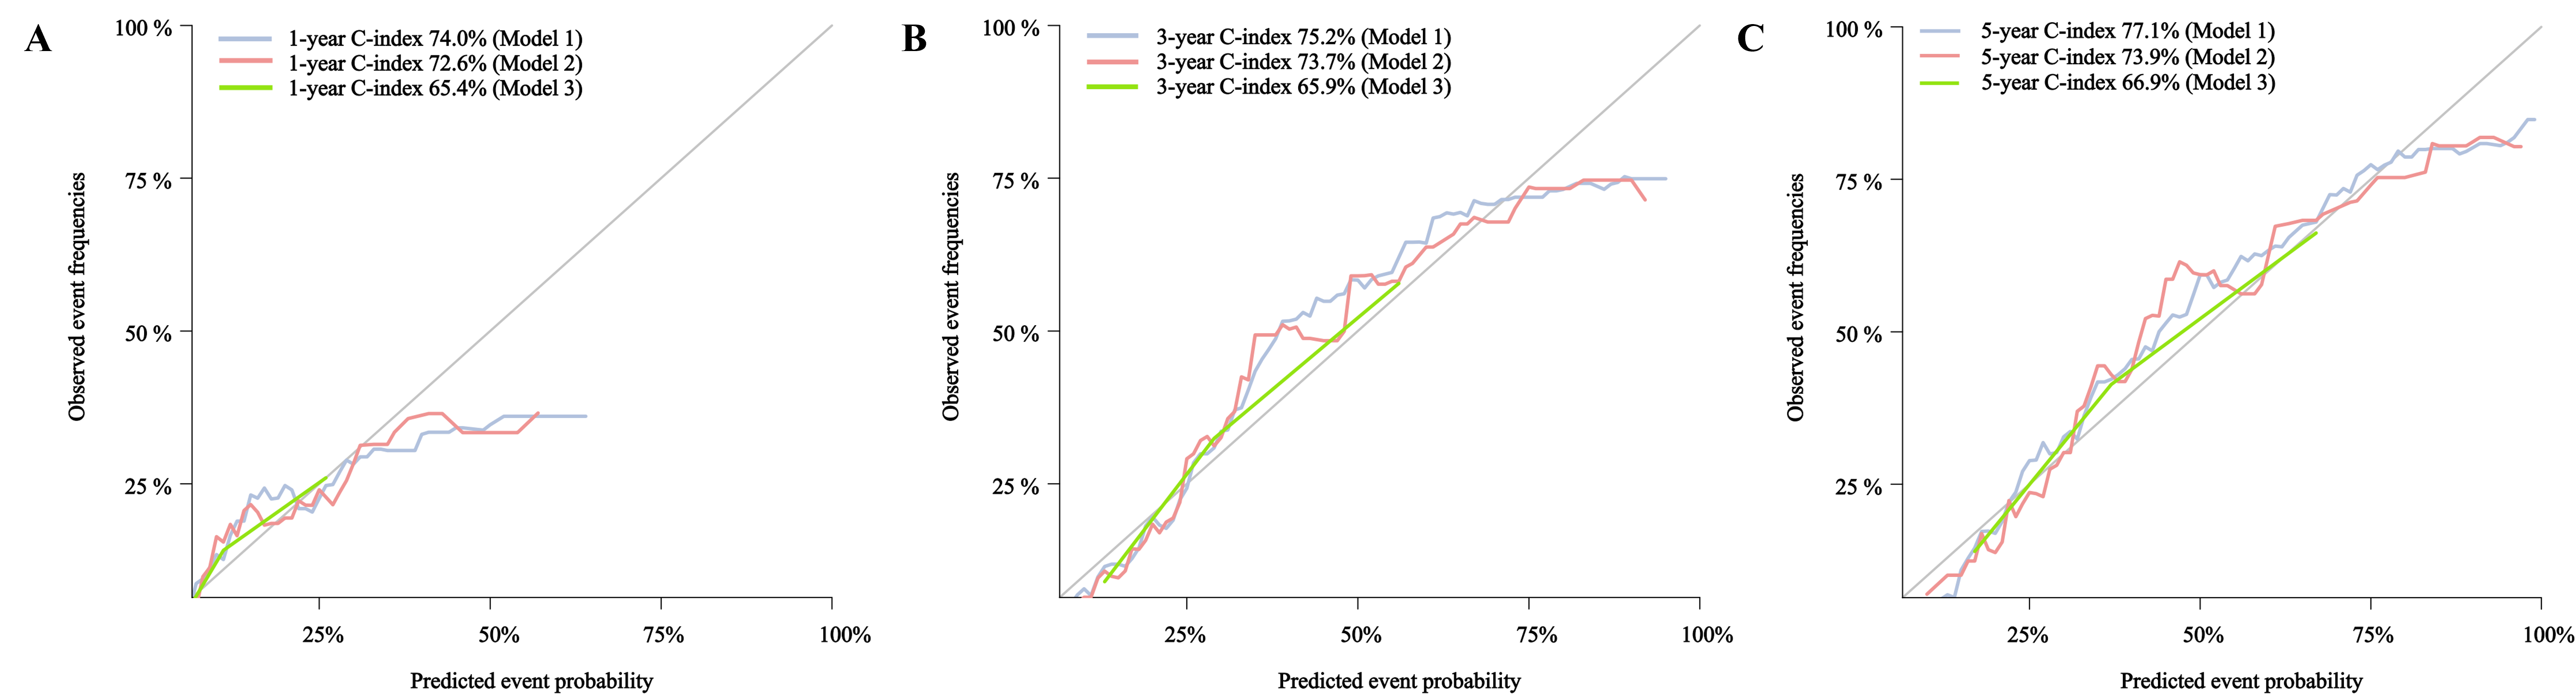


**Supplementary Figure. 4** Calibration curves for different models in the prediction of the cancer-specific death of elderly gastric cancer patients 1- (A), 3- (B) and 5-year (C) point in training cohort.


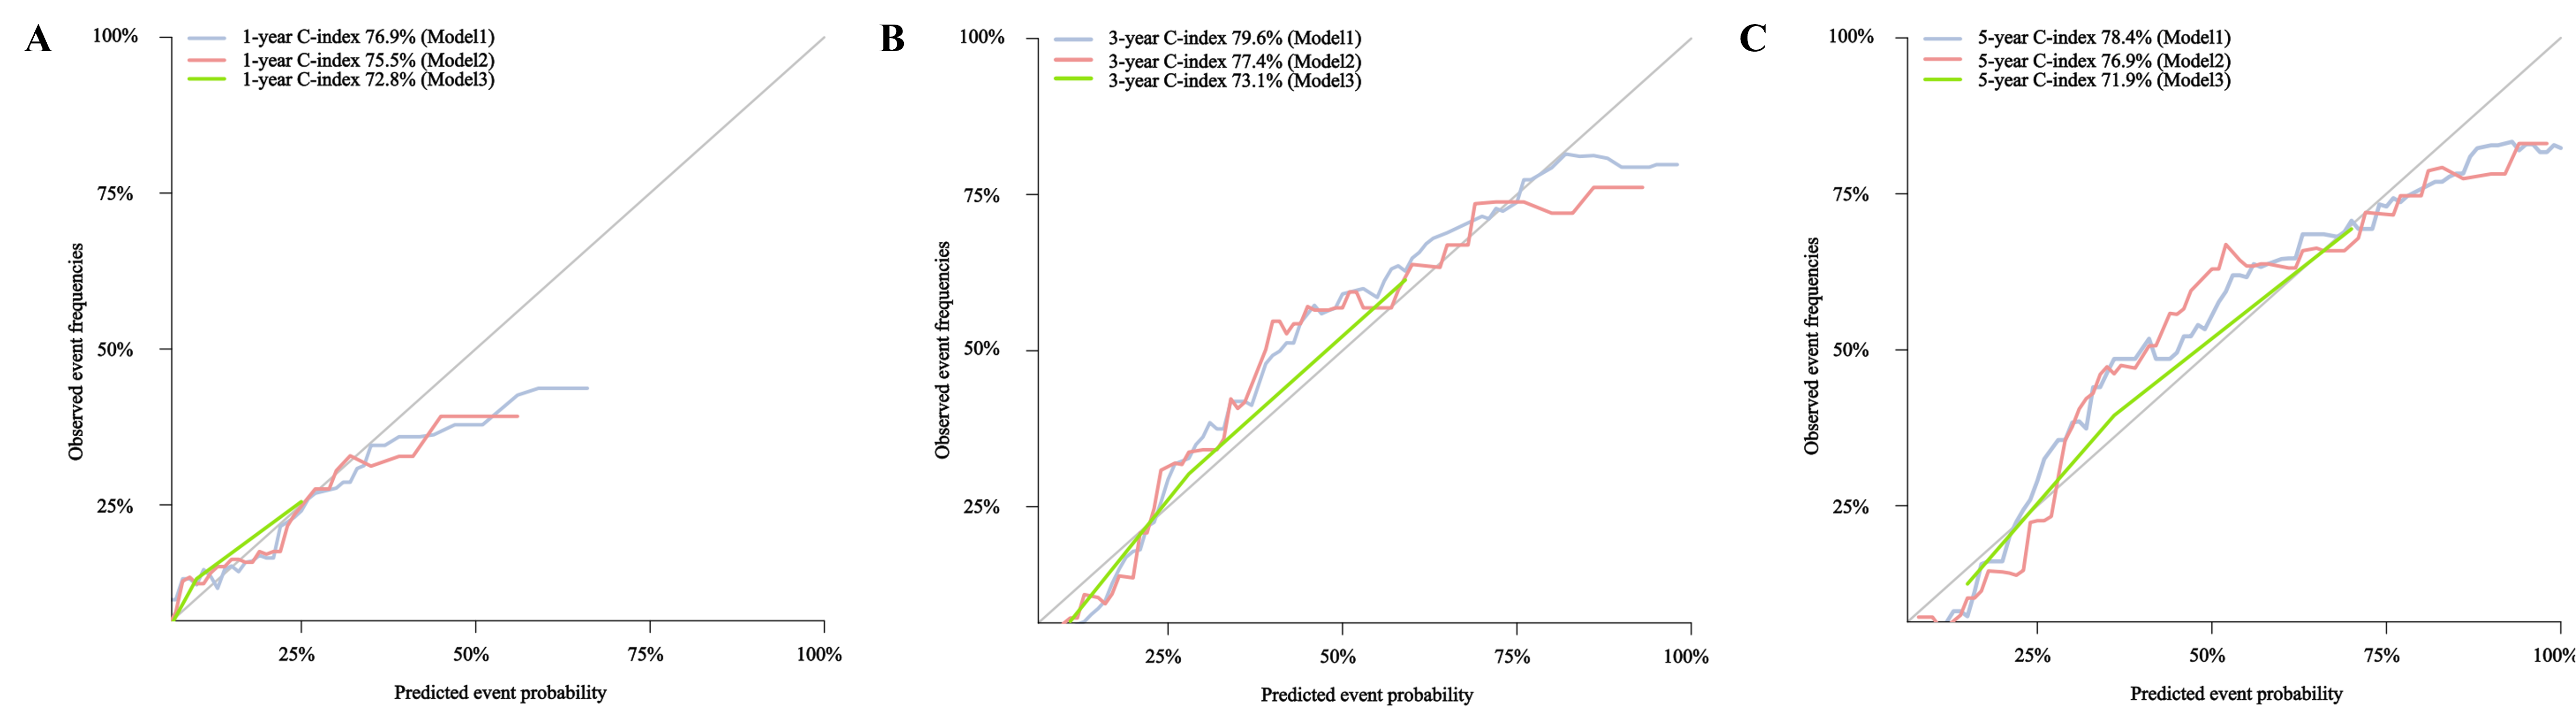


**Supplementary Figure. 5** Calibration curves for different models in the prediction of the cancer-specific death of elderly gastric cancer patients 1- (A), 3- (B) and 5-year (C) point in internal validation cohort.


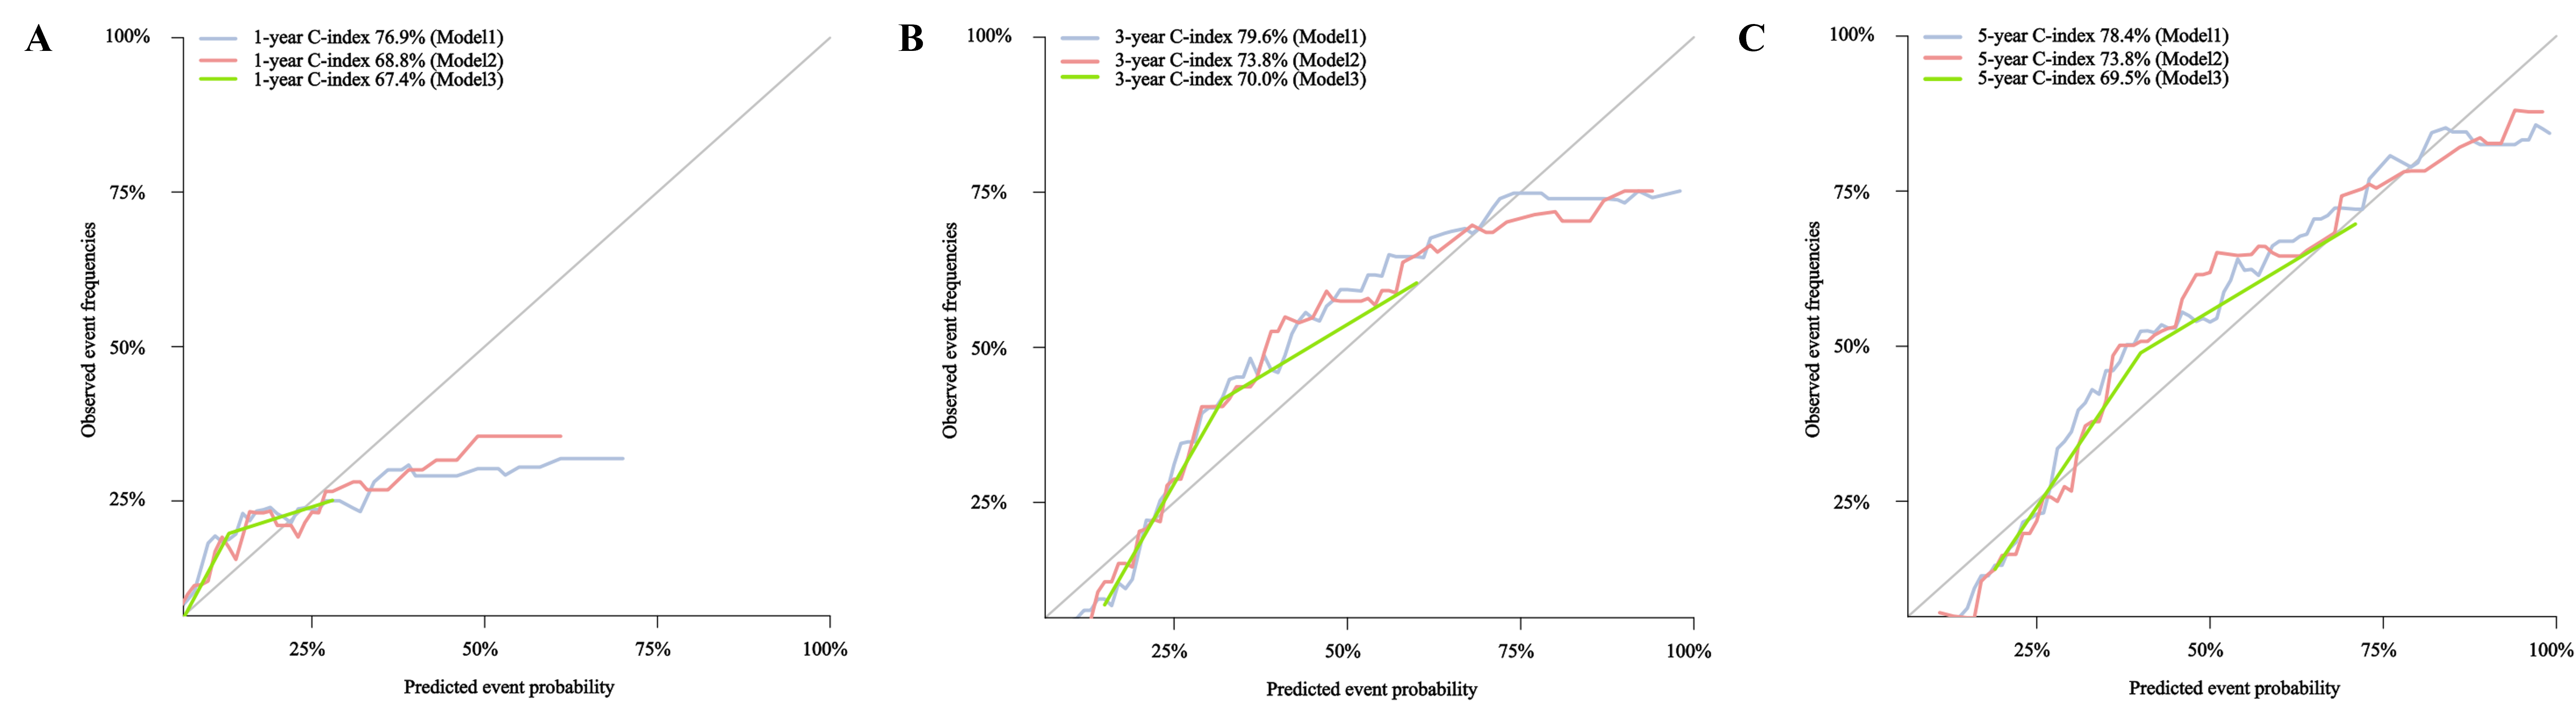


**Supplementary Figure. 6** Calibration curves for different models in the prediction of the cancer-specific death of elderly gastric cancer patients 1- (A), 3- (B) and 5-year (C) point in external validation cohort.


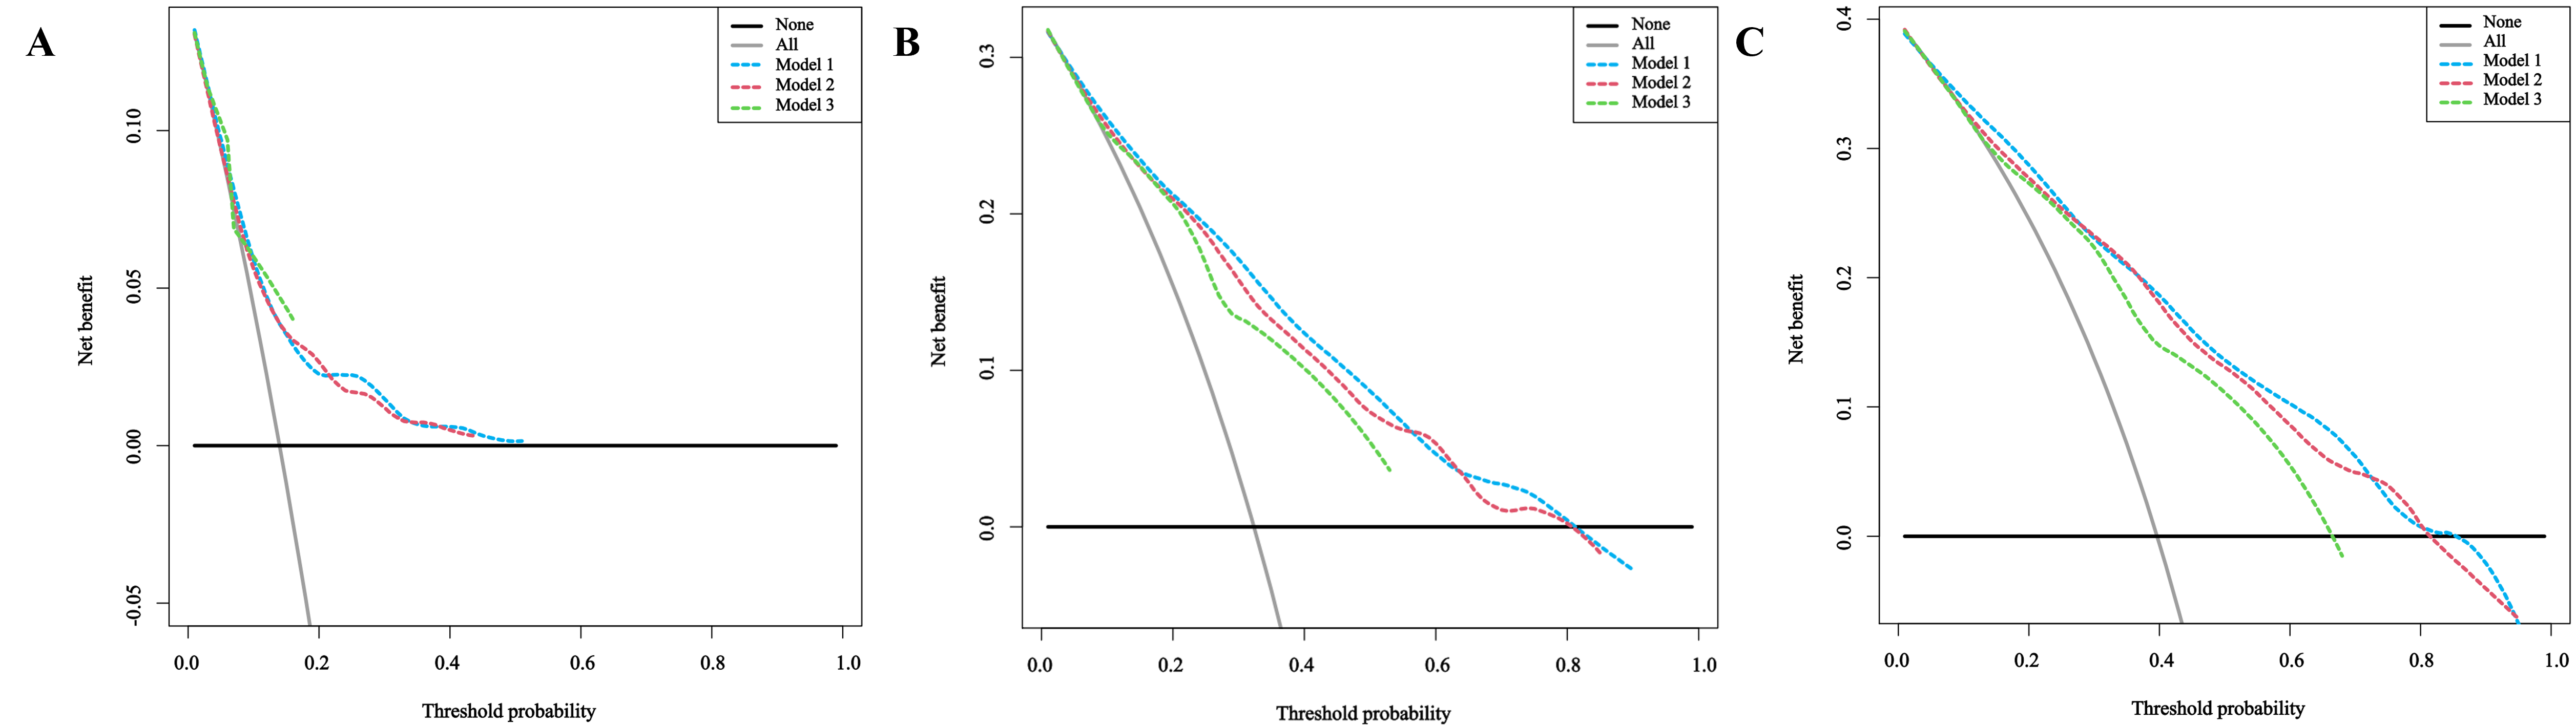


**Supplementary Figure. 7** Decision curve analysis for different models in the prediction of the cancer-specific death of elderly gastric cancer patients 1- (A), 3- (B) and 5-year (C) point in training cohort.


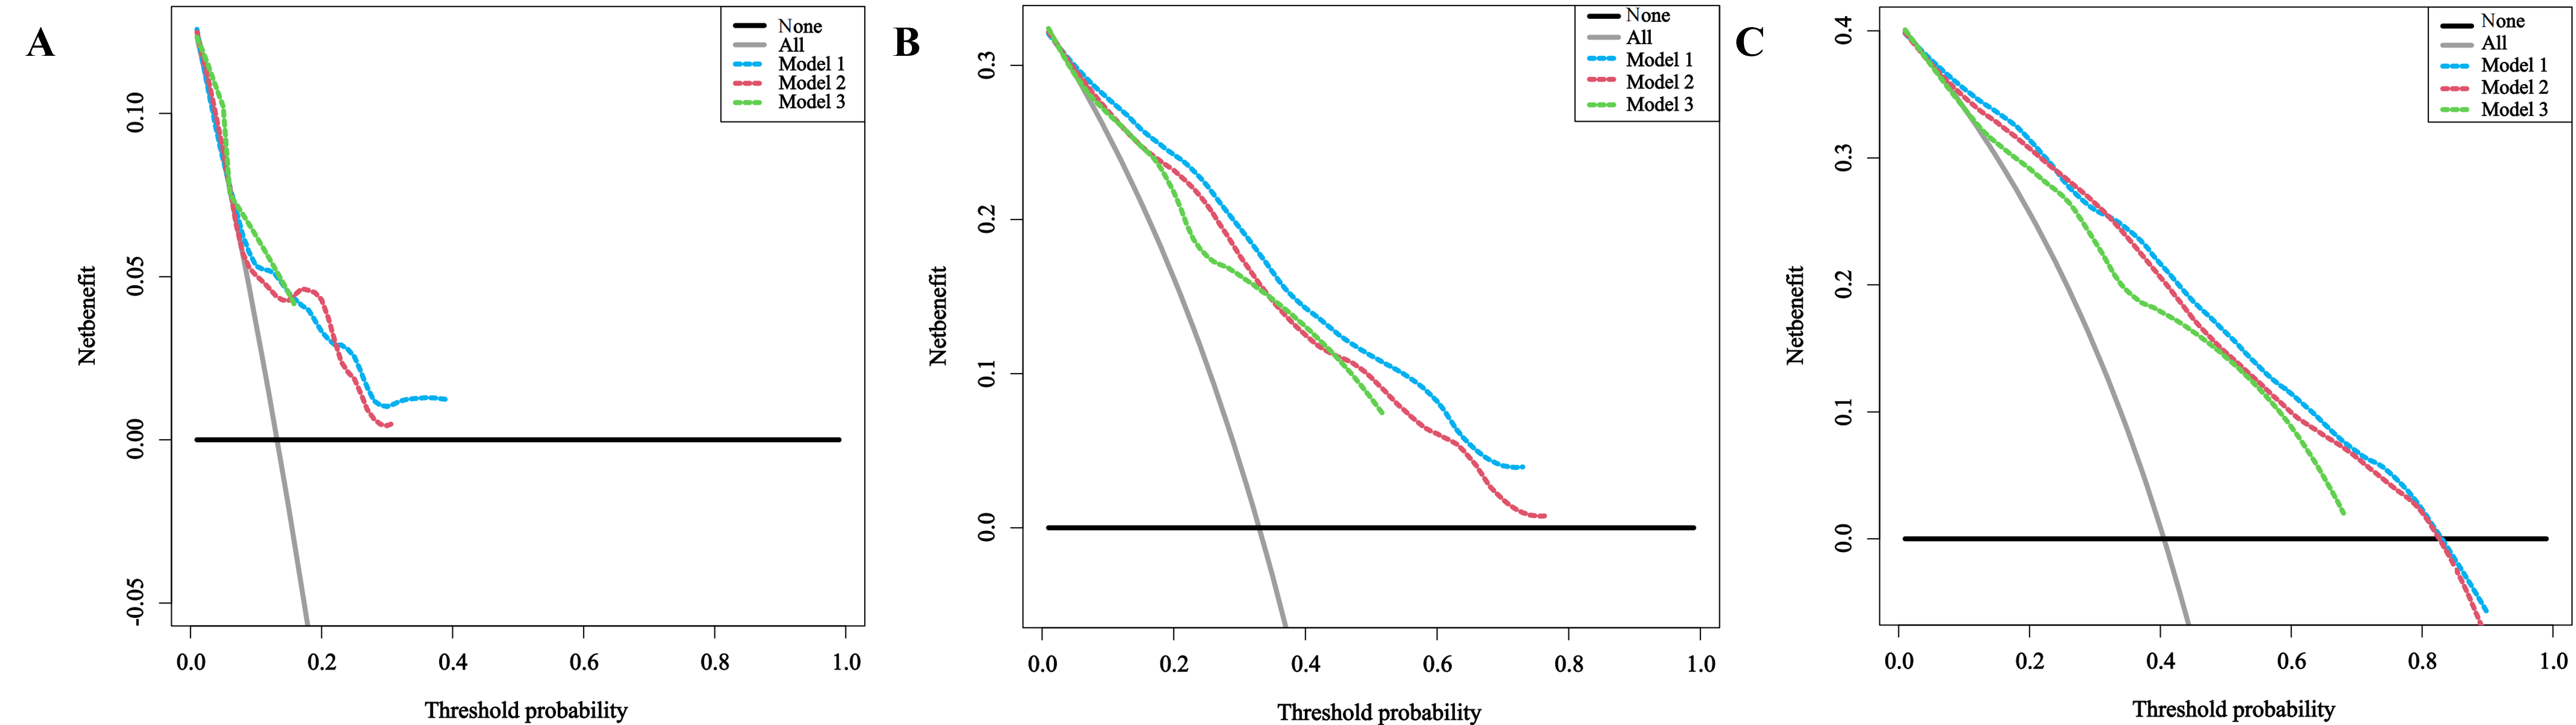


**Supplementary Figure. 8** Decision curve analysis for different models in the prediction of the cancer-specific death of elderly gastric cancer patients 1- (A), 3- (B) and 5-year (C) point in internal validation cohort.


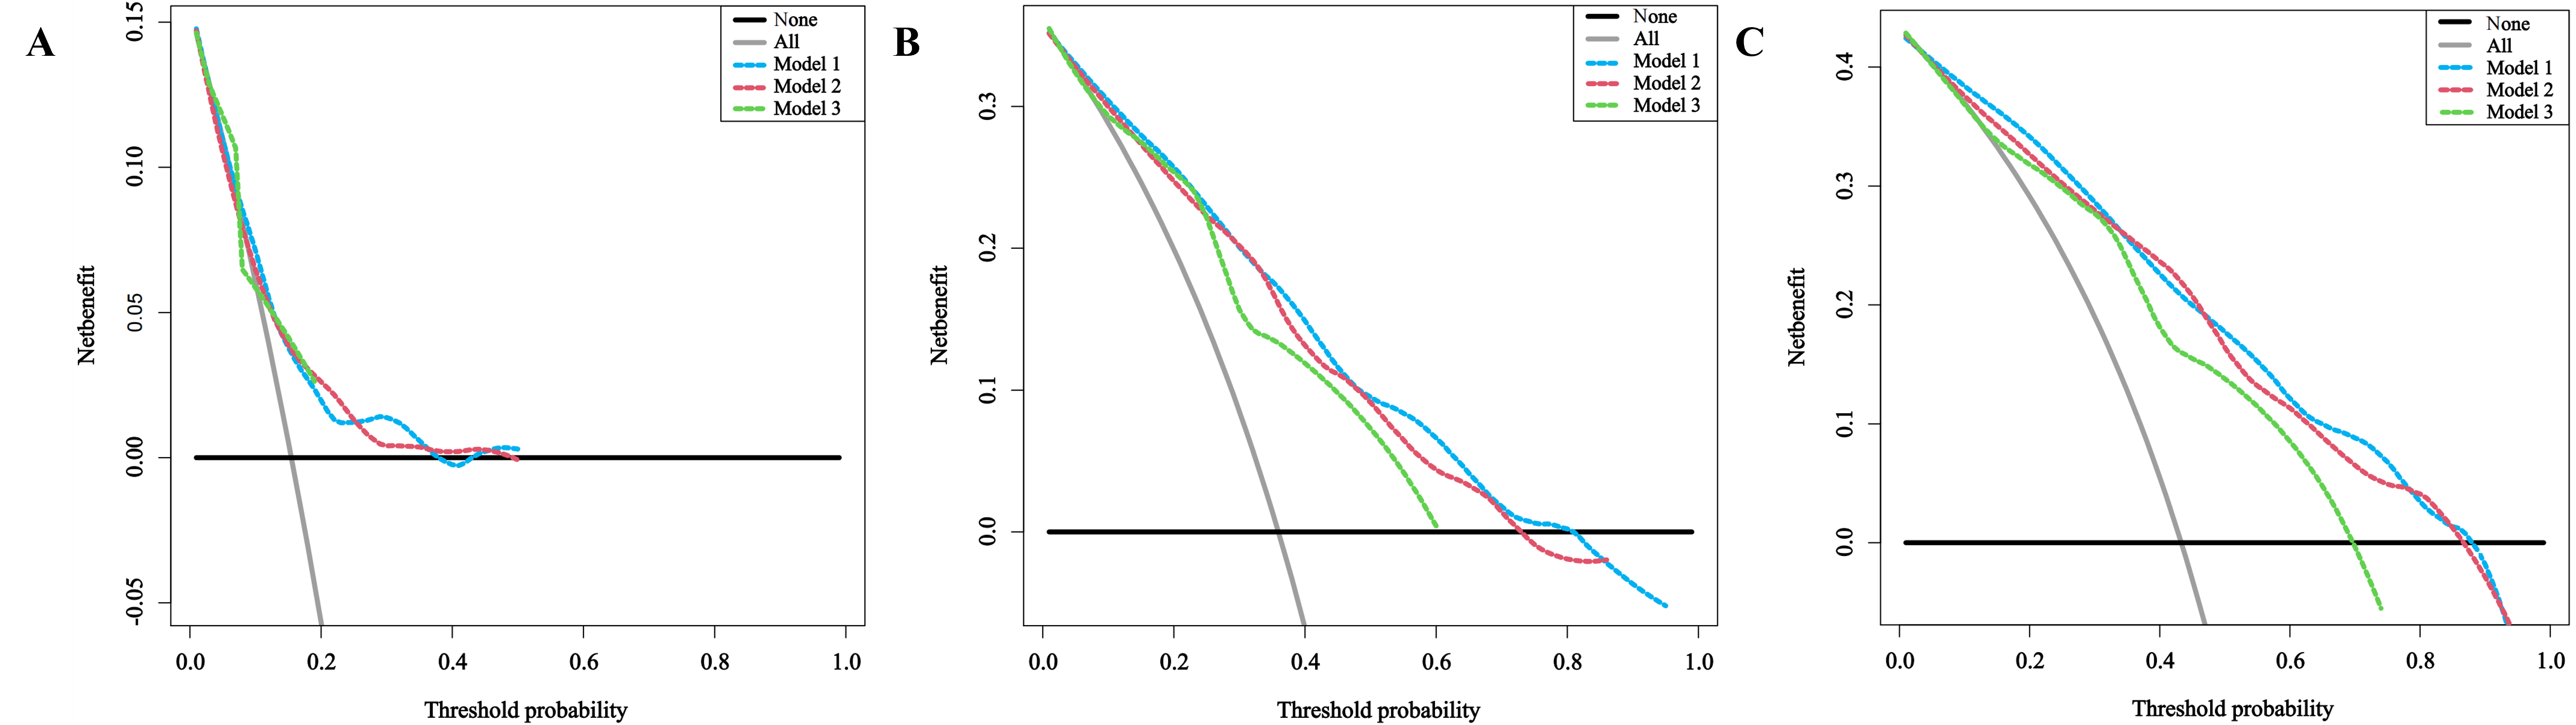


**Supplementary Figure. 9** Decision curve analysis for different models in the prediction of the cancer-specific death of elderly gastric cancer patients 1- (A), 3- (B) and 5-year (C) point in external validation cohort.

**
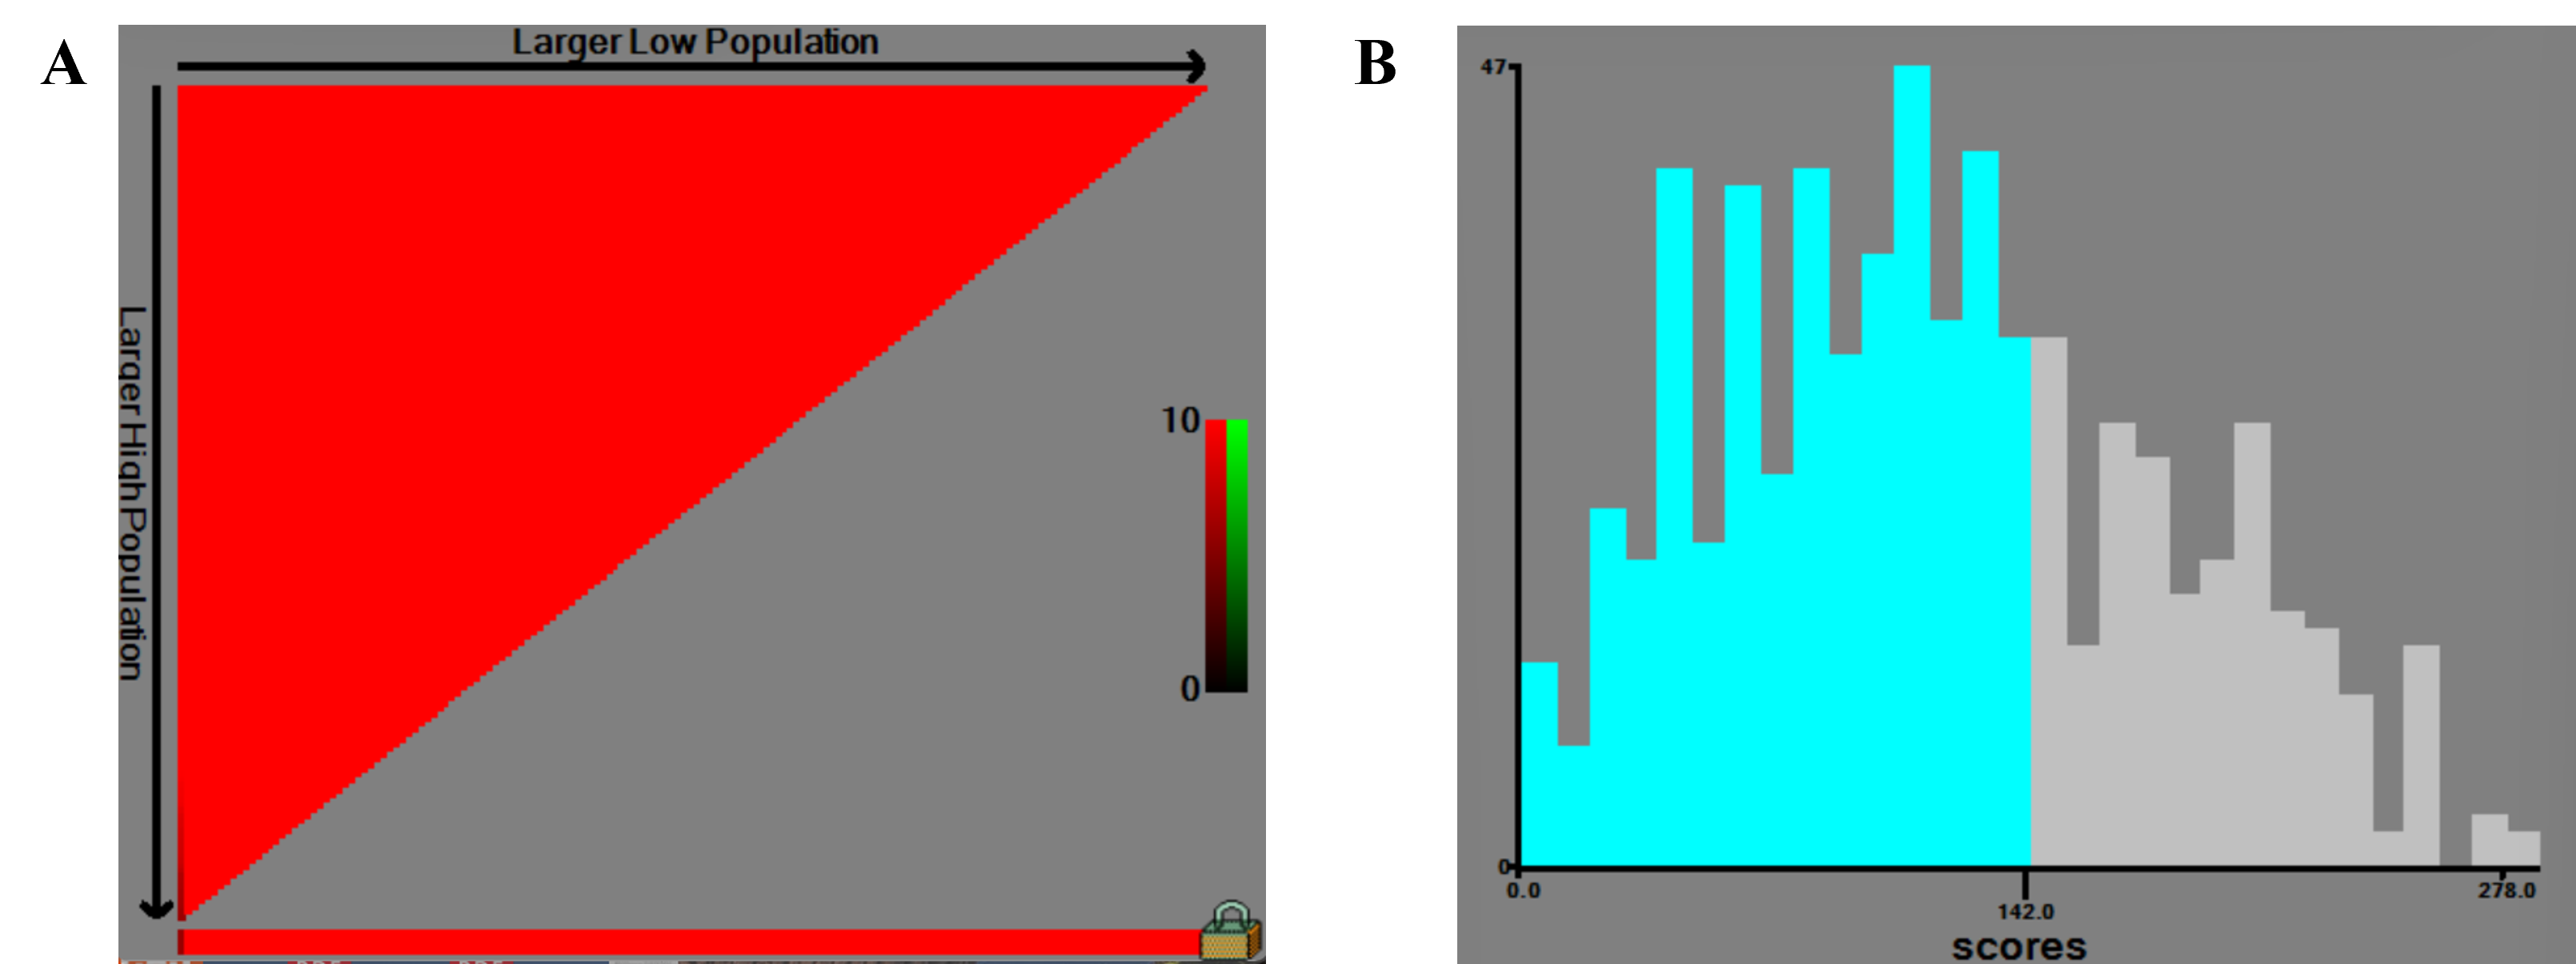
**

**Supplementary Figure. 10** Analysis of the best-cutoff point of Model 1 using X-tile program. A X-tile plot of Model 1 score; B the cutoff point was highlighted using a histogram of the entire patients.


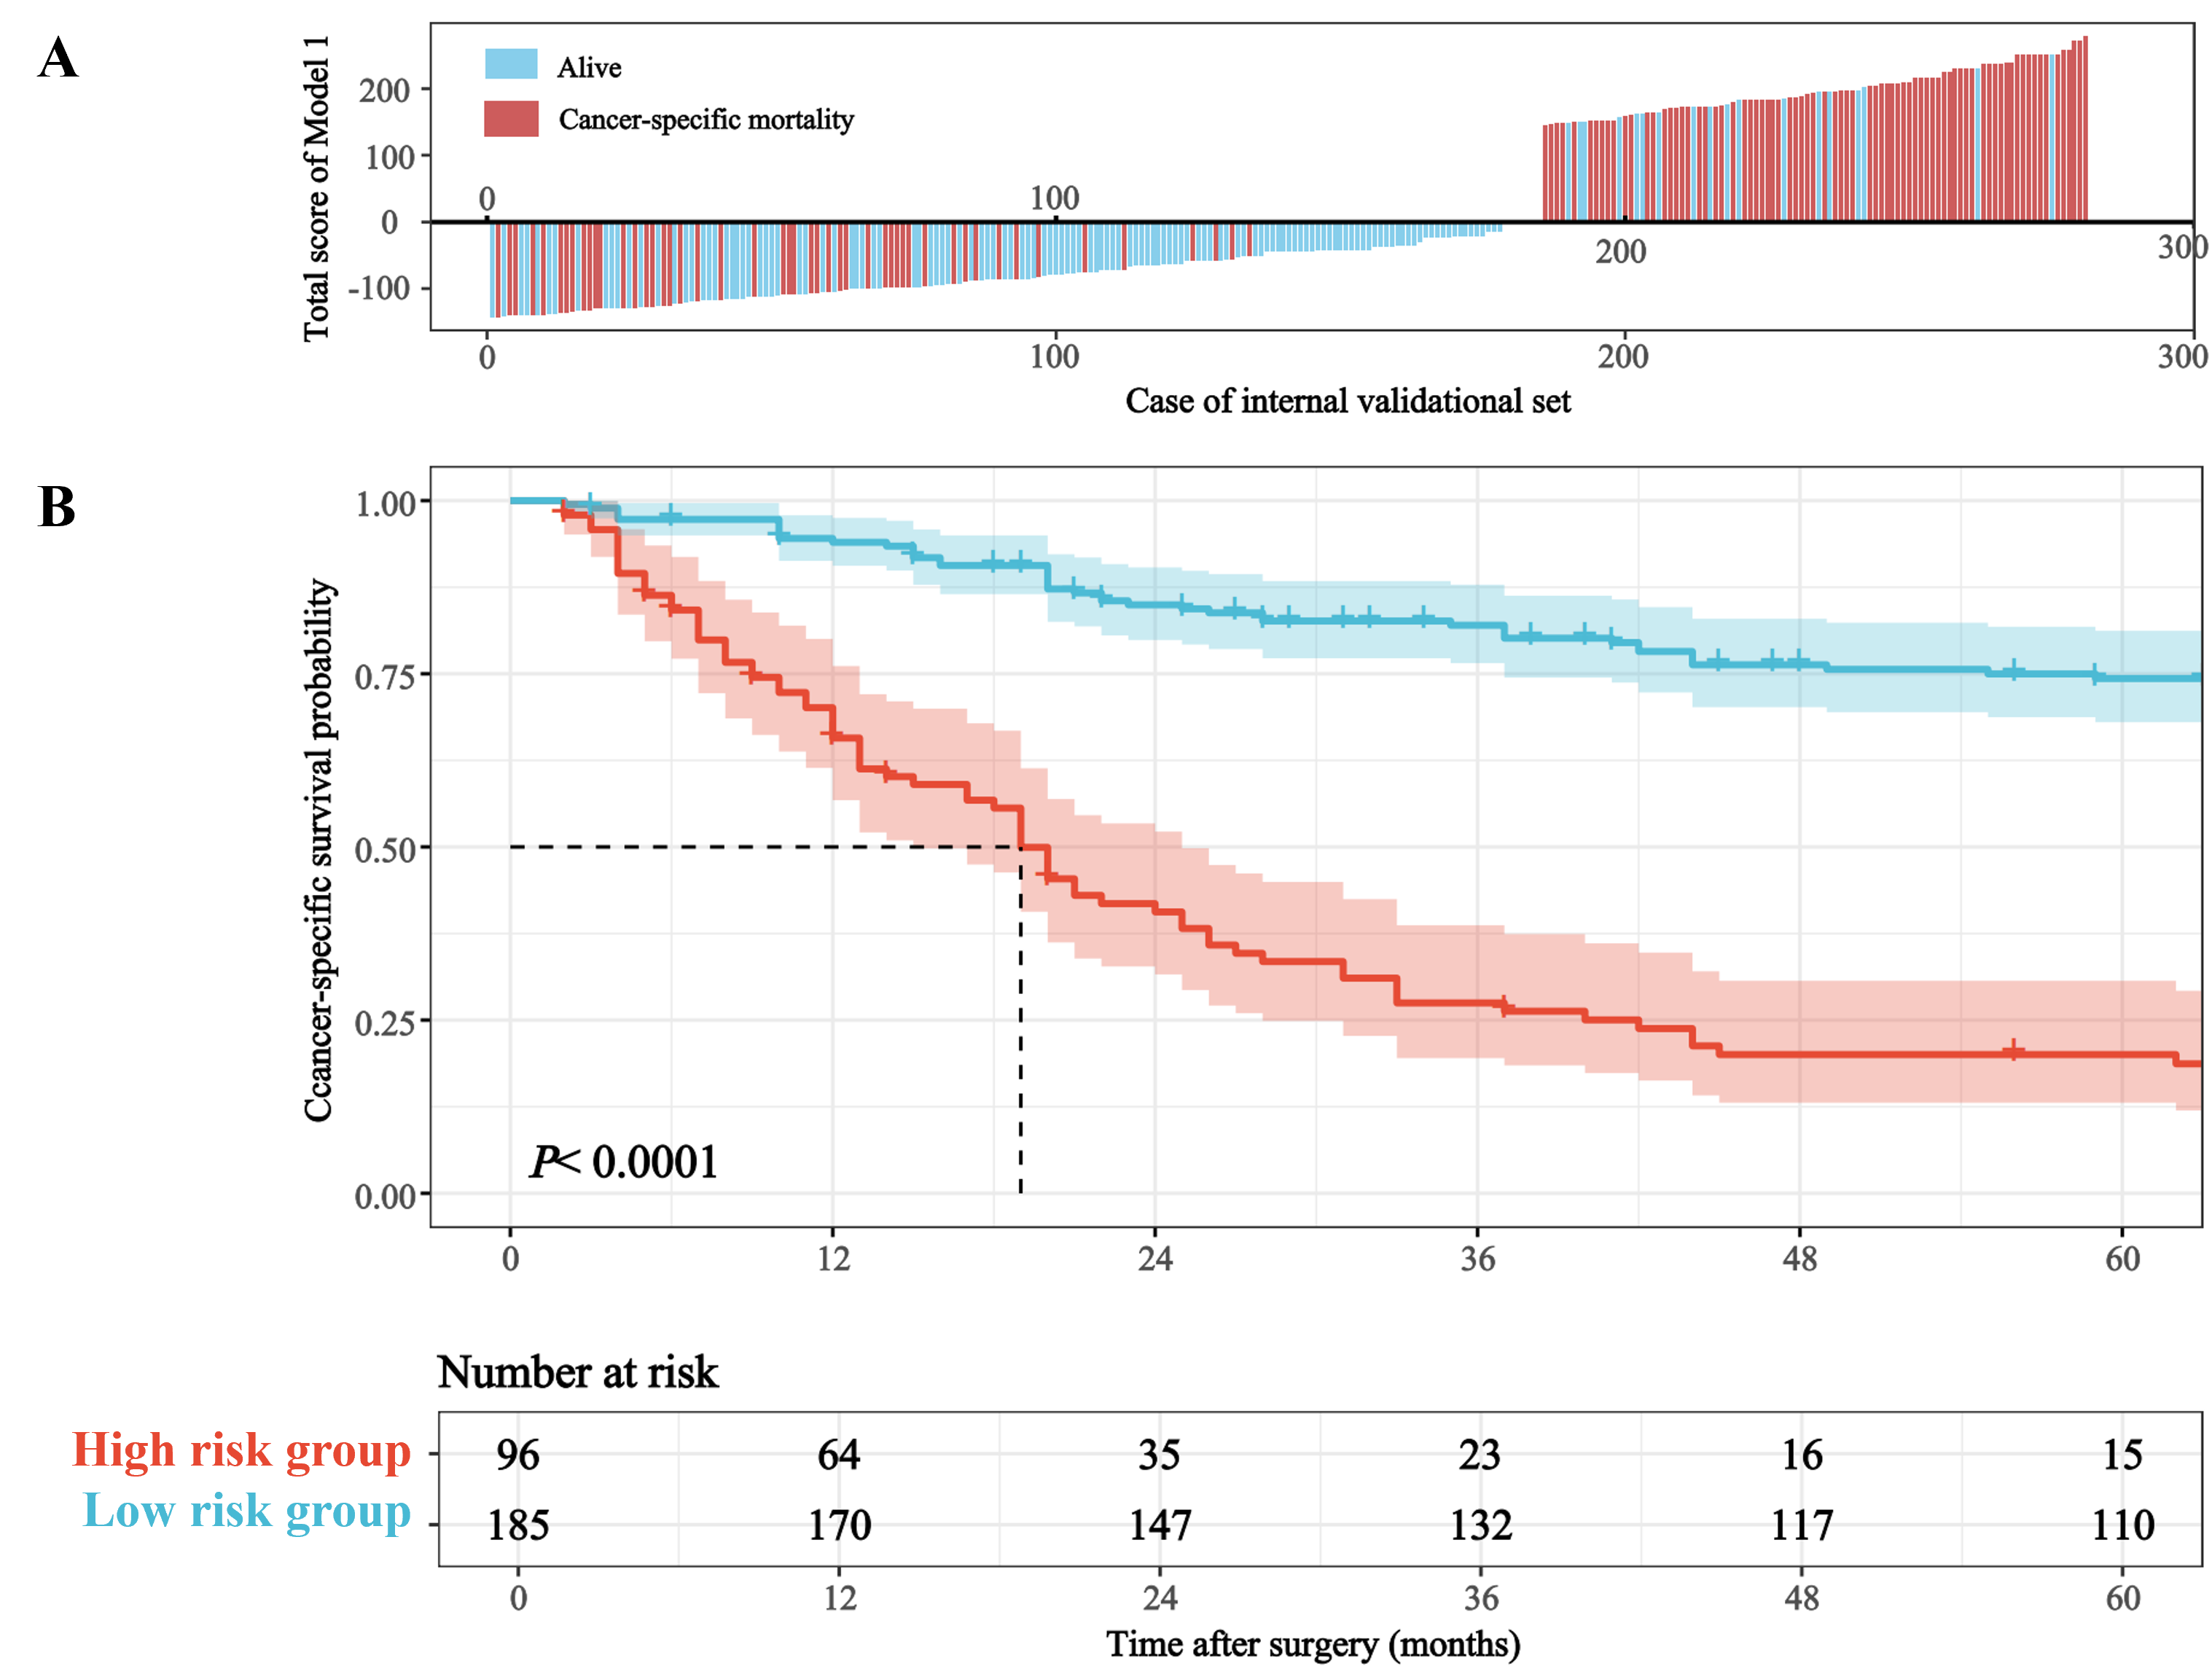


**Supplementary Figure. 11** Distribution of total score for patients and comparison of the cancer-specific survival of high-risk and low-risk patients in internal validation cohort.


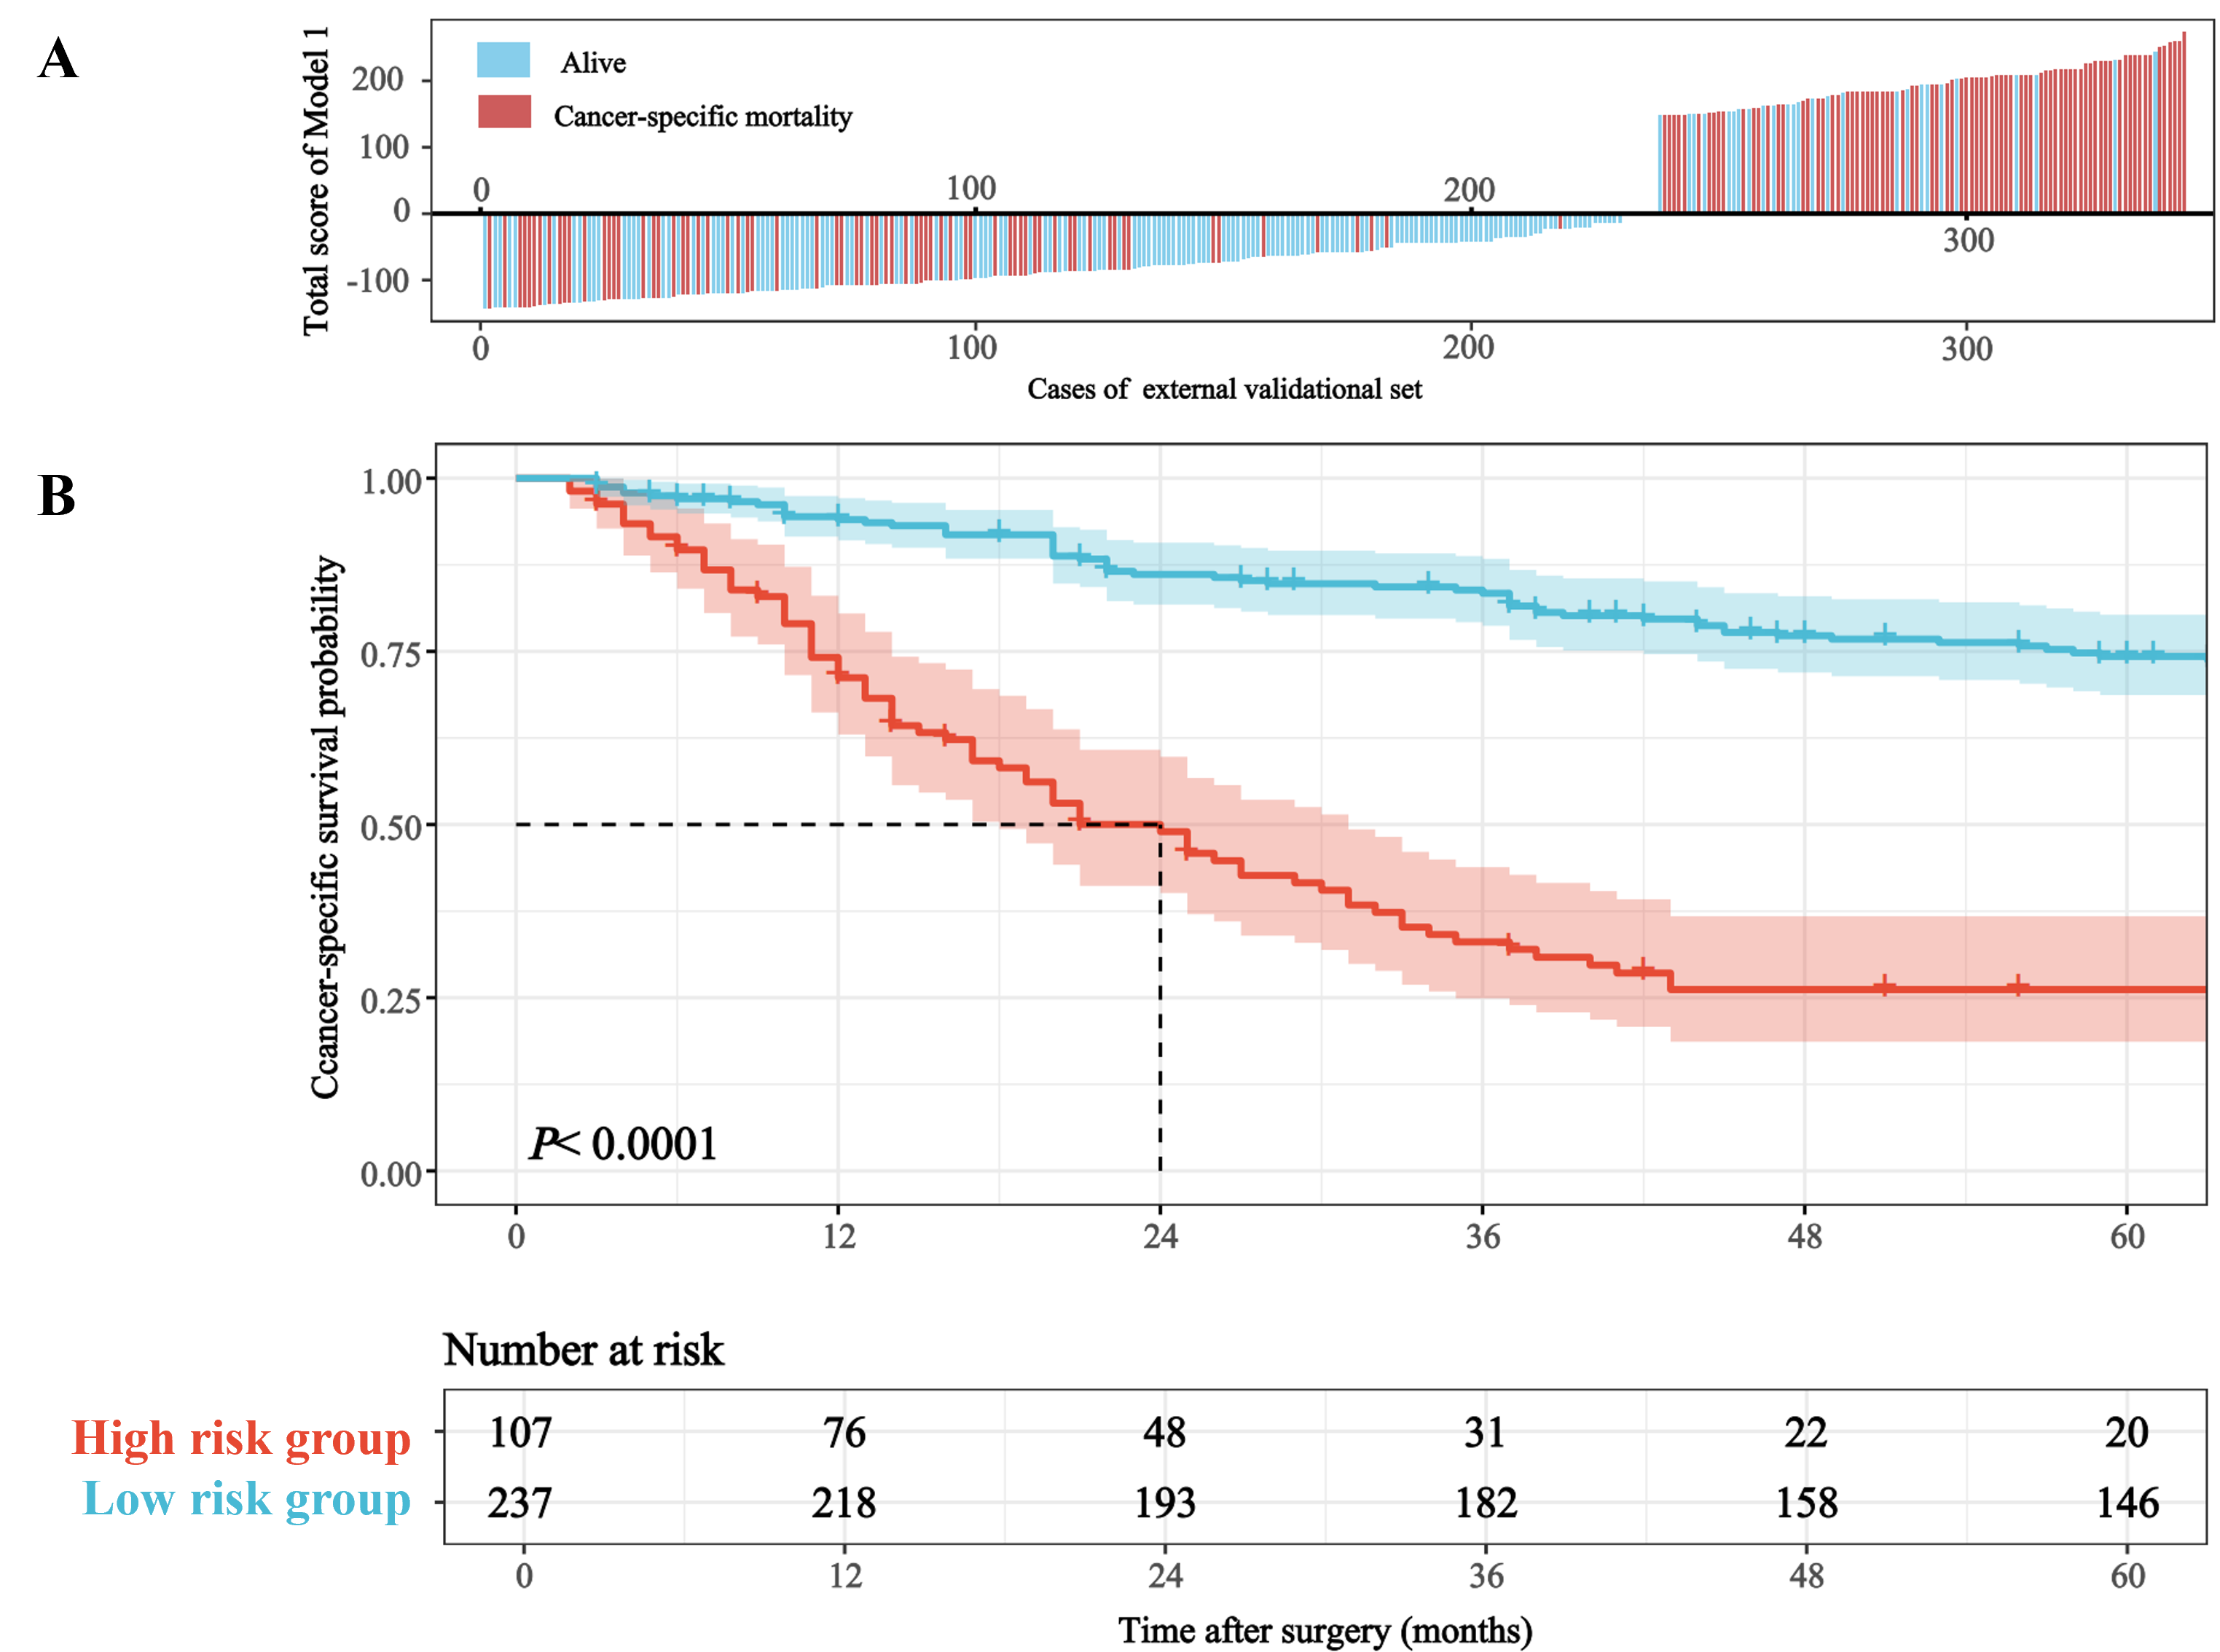


**Supplementary Figure. 12** Distribution of total score for patients and comparison of the cancer-specific survival of high-risk and low-risk patients in external validation cohort.
